# Supplementary material
Source: publisher figshare collection journal article supplement (https://gsajournals.figshare.com/ndownloader/files/12802739)
Supplement: Supplementary file 1 [file 12802739]

A.


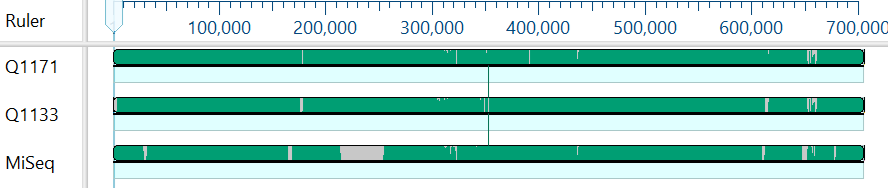


B.


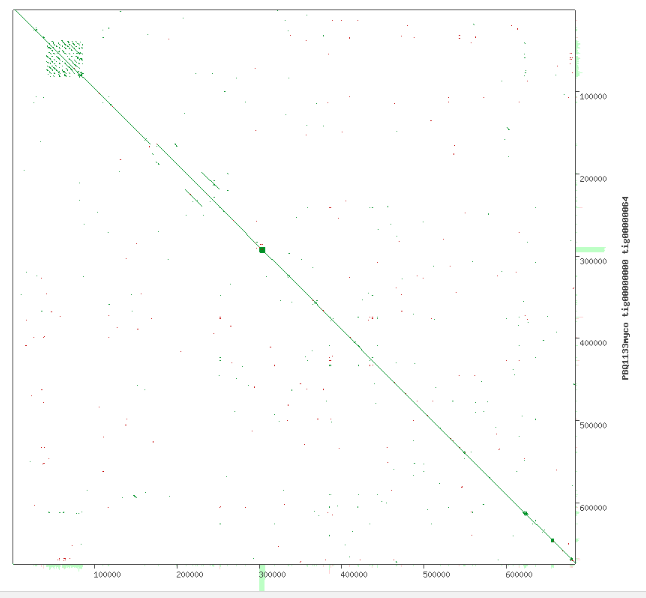


Fig S1 A. Mauve alignment of three PacBio assemblies of *M. vittatus*. Q1171 shows a 3601 bp extension at the 5’ end, whereas Q1133 shows a 650 bp overlap at the 3’ end.

B. Dot plot of PB1133 (X axis) and PB1171 (Y axis) indicates no overlap of extensions on the two assemblies.
